# Supplementary material for: A highly diverse, desert-like microbial biocenosis on solar panels in a Mediterranean city
Source: PubMed Central journal article supplement (PMC4932501; doi:10.1038/srep29235), 2016-07-05
Supplement: srep29235-s1.pdf [file srep29235-s1.pdf]

# A highly diverse, desert-like microbial biocenosis on solar panels in a Mediterranean city

Pedro Dorado-Morales<sup>1,+</sup>, Cristina Vilanova<sup>1,2,+</sup>, Juli Peretó<sup>1,2,3</sup>, Francisco M. Codoñer<sup>4</sup>,  
Daniel Ramón<sup>5</sup> and Manuel Porcar<sup>1,2,\*</sup>

<sup>1</sup>Institut Cavanilles de Biodiversitat i Biologia Evolutiva, Universitat de València, Paterna  
46980, Spain

<sup>2</sup>Darwin Bioprospecting Excellence, S.L., Parc Científic Universitat de València, Paterna,  
Valencia, Spain

<sup>3</sup>Departament de Bioquímica i Biologia Molecular, Universitat de València, Burjassot  
46100, Spain

<sup>4</sup>Lifesequencing S.L., Parc Científic Universitat de València, Paterna, Spain.

<sup>5</sup>Biopolis S.L., Parc Científic Universitat de València, Paterna, Valencia, Spain

\*Address correspondence to Manuel Porcar: [manuel.porcar@uv.es](mailto:manuel.porcar@uv.es)

<sup>+</sup>These authors contributed equally to this work.

## Supplementary information

### Supplementary Tables

**Table S1.** Taxonomical classification of the bacterial species isolated from solar panel samples according to 16S rDNA sequence similarity.

| # | Isolate ID | Best BLAST hit                    | #  | Isolate ID | Best BLAST hit                     |
|---|------------|-----------------------------------|----|------------|------------------------------------|
| 1 | S10-LB-01  | <i>Planomicrobium glaciei</i>     | 28 | S13-LB-03  | <i>Kocuria rosea</i>               |
| 2 | S10-LB-02  | <i>Kocuria rosea</i>              | 29 | S13-LB-04  | <i>Planomicrobium chinense</i>     |
| 3 | S10-LB-03  | <i>Kocuria rosea</i>              | 30 | S13-LB-05  | <i>Planomicrobium koreense</i>     |
| 4 | S10-LB-04  | <i>Microbacterium paraoxydans</i> | 31 | S13-LB-06  | <i>Pseudomonas psychrotolerans</i> |

|    |              |                                     |    |            |                                    |
|----|--------------|-------------------------------------|----|------------|------------------------------------|
| 5  | S10-LB-05    | <i>Planomicrobium glaciei</i>       | 32 | S13-MAR-01 | N.A.                               |
| 6  | S10-LB-06    | <i>Arthrobacter agilis</i>          | 33 | S13-MAR-02 | <i>Bacillus aquimaris</i>          |
| 7  | S10-LB-07    | <i>Kocuria sediminis</i>            | 34 | S13-MAR-03 | N.A.                               |
| 8  | S10-LB-09    | <i>Kocuria rosea</i>                | 35 | S13-MAR-04 | <i>Planococcaceae bacterium</i>    |
| 9  | S11-LB-01    | <i>Kocuria rosea</i>                | 36 | S13-MAR-05 | N.A.                               |
| 10 | S11-LB-02    | <i>Micrococcus xinjiangensis</i>    | 37 | S13-MAR-06 | <i>Planomicrobium okeanokoites</i> |
| 11 | S11-LB-03    | <i>Planomicrobium glaciei</i>       | 38 | S14-LB-01  | <i>Planococcaceae bacterium</i>    |
| 12 | S11-LB-04-01 | <i>Bacillus infantis</i>            | 39 | S14-LB-02  | N.A.                               |
| 13 | S11-LB-04-02 | <i>Bacillus infantis</i>            | 40 | S14-LB-03  | <i>Planomicrobium chinense</i>     |
| 14 | S11-LB-05    | N.A.                                | 41 | S14-LB-04  | <i>Kocuria rosea</i>               |
| 15 | S12-LB-01    | <i>Kocuria rosea</i>                | 42 | S14-MAR-01 | <i>Planomicrobium okeanokoites</i> |
| 16 | S12-LB-02    | <i>Cellulosimicrobium cellulans</i> | 43 | S14-MAR-02 | <i>Planomicrobium okeanokoites</i> |
| 17 | S12-LB-03    | <i>Planomicrobium glaciei</i>       | 44 | S14-MAR-03 | N.A.                               |
| 18 | S12-LB-04    | <i>Enterobacter cloacae</i>         | 45 | S15-LB-01  | <i>Kocuria rosea</i>               |
| 19 | S12-LB-05    | <i>Kocuria rosea</i>                | 46 | S16-LB-01  | <i>Kocuria rosea</i>               |
| 20 | S12-LB-06    | <i>Bacillus flexus</i>              | 47 | S16-LB-02  | <i>Arthrobacter agilis</i>         |
| 21 | S12-LB-07    | N.A.                                | 48 | S16-LB-03  | N.A.                               |
| 22 | S12-LB-08    | <i>Planomicrobium glaciei</i>       | 49 | S17-LB-01  | <i>Kocuria rosea</i>               |
| 23 | S12-LB-09    | <i>Planomicrobium glaciei</i>       | 50 | S18-MAR-01 | N.A.                               |
| 24 | S12-LB-10    | <i>Cellulosimicrobium cellulans</i> | 51 | S18-MAR-02 | <i>Planomicrobium chinense</i>     |
| 25 | S12-LB-11    | <i>Kocuria rosea</i>                | 52 | S18-MAR-03 | <i>Domibacillus robiginosus</i>    |
| 26 | S13-LB-01    | <i>Planomicrobium okeanokoites</i>  | 53 | S19-MAR-01 | <i>Domibacillus robiginosus</i>    |
| 27 | S13-LB-02    | <i>Planomicrobium okeanokoites</i>  |    |            |                                    |

N.A.: Non-assigned. Low quality sequences or assignments

**Table S2.** Summary of sequencing statistics from the 16S/18S profile analysis.

|                               | Solar panel pool<br>(2013) |        | Solar panel 1<br>(2014) |      | Solar panel 2<br>(2014) |      | Solar panel 3<br>(2014) |       |
|-------------------------------|----------------------------|--------|-------------------------|------|-------------------------|------|-------------------------|-------|
|                               | 16S                        | 18S    | 16S                     | 18S  | 16S                     | 18S  | 16S                     | 18S   |
| # Sequences obtained          | 485094                     | 105781 | 47013                   | 4566 | 48633                   | 5446 | 25971                   | 18260 |
| Average length                | 582                        | 574    | 495                     | 456  | 498                     | 478  | 505                     | 507   |
| Total Mb                      | 282,32                     | 60,71  | 23,28                   | 2,08 | 24,26                   | 2,61 | 13,13                   | 9,27  |
| # Sequences after trimming    | 136194                     | 6463   | 25184                   | 796  | 23628                   | 1722 | 14804                   | 6220  |
| Averag. length after trimming | 549                        | 551    | 473                     | 475  | 481                     | 478  | 486                     | 490   |
| # Genera (>0.01% abundance)   | 160                        | 40     | 119                     | 43   | 168                     | 34   | 138                     | 28    |
| # Species (>0.01% abundance)  | 303                        | 49     | 249                     | 78   | 343                     | 63   | 271                     | 61    |
| Shannon index                 | 4,94                       | 4,01   | 5,64                    | 3,74 | 6,23                    | 4,89 | 5,31                    | 4,62  |

**Table S3.** Summary of sequencing statistics from the shotgun metagenomic sequencing of solar panels 1 and 3 in 2014.

|                                                   | Solar panel 1<br>(2014) | Solar panel 3<br>(2014) |
|---------------------------------------------------|-------------------------|-------------------------|
| Number of reads obtained                          | 18596346                | 19220250                |
| Average length                                    | 186,315                 | 186,345                 |
| Total Mb                                          | 3464,783                | 3581,649                |
| Average quality                                   | 32,855                  | 32,995                  |
| Number of sequences after trimming                | 18240690                | 18716970                |
| Average length after trimming                     | 188,19                  | 188,81                  |
| Total Mb after trimming                           | 3432,688                | 3533,922                |
| Average quality after trimming                    | 33,075                  | 33,275                  |
| Number of contigs after assembly                  | 1486634                 | 717211                  |
| N50                                               | 229                     | 335                     |
| Maximum contig length                             | 6408                    | 13796                   |
| Average contig length                             | 262                     | 405                     |
| Number of predicted ORFs                          | 104311                  | 189676                  |
| Number of genera (>0.01% abundance) <sup>1</sup>  | 254                     | 453                     |
| Number of species (>0.01% abundance) <sup>1</sup> | 487                     | 669                     |
| Shannon index <sup>2</sup>                        | 4,39                    | 5,57                    |

<sup>1</sup> Estimated from BLASTP searches of the predicted ORFs against the NCBI nr database (e-value < 1e-5)

<sup>2</sup> Calculated from species-level assignments

**Table S4.** Differentially expressed proteins between day- and night-collected samples.

|                     |                                                                                              | Day/Night<br>t-value | p-<br>value | Fold<br>Change<br>Day/Night | Fold<br>Change<br>Night/Day |
|---------------------|----------------------------------------------------------------------------------------------|----------------------|-------------|-----------------------------|-----------------------------|
| <b>gi 504554779</b> | cold-shock protein [Geodermatophilaceae]                                                     | 3,122                | 0,035       | 25,986                      | 0,038                       |
| <b>gi 656266558</b> | molecular chaperone GroEL<br>[Arsenicoccus bolidensis]                                       | 4,361                | 0,012       | 13,665                      | 0,073                       |
| <b>gi 503987093</b> | 50S ribosomal protein L7/L12<br>[Niastella koreensis]                                        | 3,041                | 0,038       | 9,944                       | 0,101                       |
| <b>gi 502016435</b> | hypothetical protein<br>[Deinococcus deserti]                                                | 3,625                | 0,022       | 9,373                       | 0,107                       |
| <b>gi 517310793</b> | ATP-1 H <sup>+</sup> -transporting ATP synthase<br>[Fusarium fujikuroi IMI 58289]            | -3,263               | 0,031       | 0,473                       | 2,114                       |
| <b>gi 656340823</b> | S-layer protein<br>[Deinococcus sp. RL]                                                      | -5,991               | 0,004       | 0,346                       | 2,890                       |
| <b>gi 636360381</b> | major outer membrane lipoprotein 1<br>[Klebsiella pneumoniae MGH 64]                         | -2,847               | 0,047       | 0,189                       | 5,280                       |
| <b>gi 657196340</b> | 50S ribosomal protein L7<br>[Acidiphilium angustum]                                          | -3,031               | 0,039       | 0,188                       | 5,326                       |
| <b>gi 499563314</b> | F0F1 ATP synthase subunit beta<br>[Synechococcus elongatus]                                  | -2,968               | 0,041       | 0,150                       | 6,686                       |
| <b>gi 493585871</b> | diguanylate cyclase<br>[Frankia sp. EUN1f]                                                   | -2,884               | 0,045       | 0,116                       | 8,630                       |
| <b>gi 398394263</b> | isocitrate dehydrogenase [NAD] sub 1<br>[Zymoseptoria tritici IPO323]                        | -16,097              | 0,000       | 0,066                       | 15,147                      |
| <b>gi 518290483</b> | molecular chaperone GroEL [Roseomonas]                                                       | -9,372               | 0,001       | 0,057                       | 17,594                      |
| <b>gi 618851123</b> | membrane-bound proton-translocating<br>pyrophosphatase<br>[Clostridium tetanomorphum DSM665] | -3,028               | 0,039       | 0,024                       | 40,965                      |

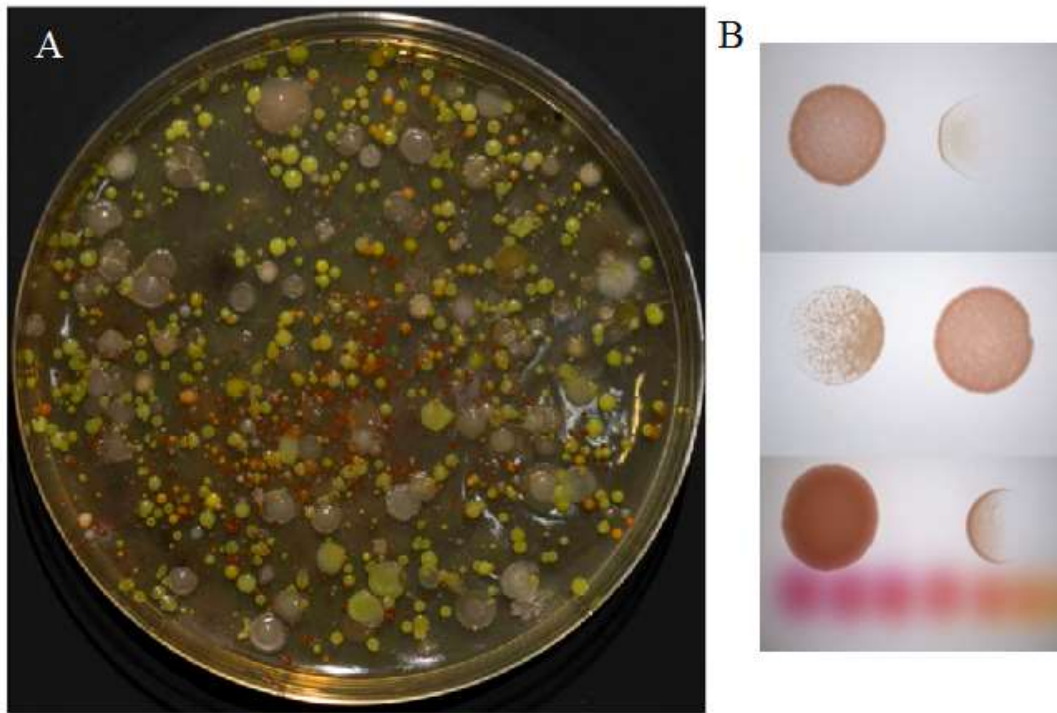

**Figure S1.** Microbial colonies growing on LB incubated at room temperature for two weeks (A). Case example of growth restoration in nearby-grown isolates under conditions of extreme pH. A local buffering of the pH of the plate is observed (B).



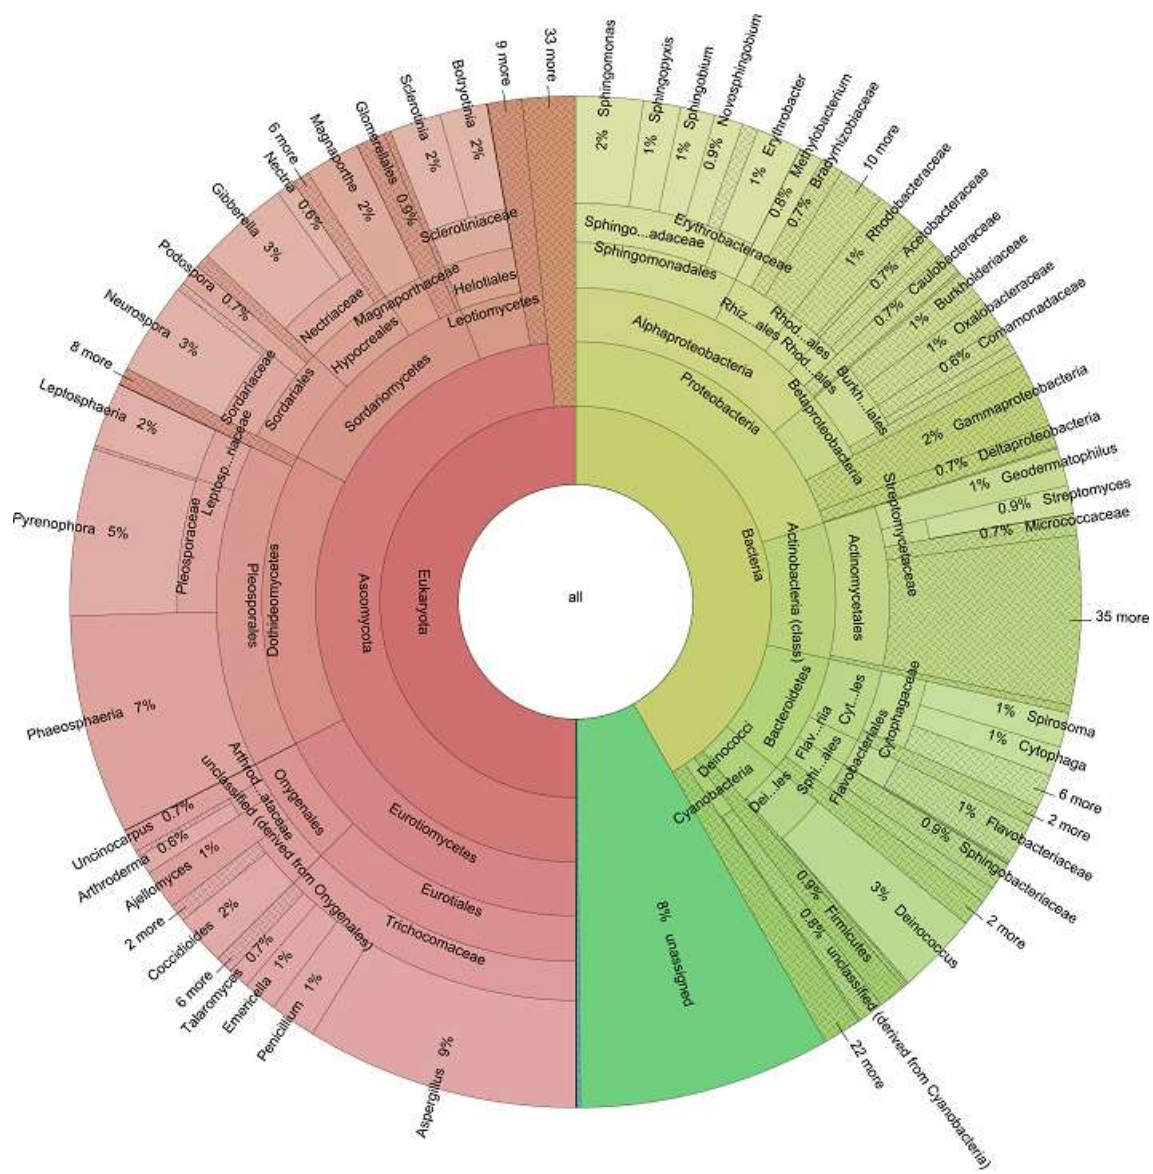

**Figure S3.** Taxonomic diversity of one of the panels (panel 1) sampled in the summer solstice of 2014 as deduced from shotgun metagenomic sequencing.
